# Supplementary material
Source: ML conference proceedings conference paper supplement (https://proceedings.neurips.cc/paper_files/paper/2018/hash/347665597cbfaef834886adbb848011f-Abstract.html)
Supplement: Supplementary file [file 347665597cbfaef834886adbb848011f-Supplemental.zip]

---

# Supplementary for ANM-MM

---

Shoubo Hu\*, Zhitang Chen<sup>†</sup>, Vahid Partovi Nia<sup>†</sup>, Laiwan Chan\*, Yanhui Geng<sup>‡</sup>

\*The Chinese University of Hong Kong; <sup>†</sup>Huawei Noah's Ark Lab;

<sup>‡</sup>Huawei Montréal Research Center

\*{sbhu, lwchan}@cse.cuhk.edu.hk

<sup>†‡</sup>{chenzhitang2, vahid.partovinia, geng.yanhui}@huawei.com

## Overview

- Proof of Lemma 1
- Derivation of (10)
- Adjusted Rand Index
- Clustering Results Visualization

## A Proof of Lemma 1

*Proof.* If there exists an Additive Noise Model (ANM) in the backward direction, i.e.,

$$X = g(Y) + \tilde{\epsilon},$$

where  $\tilde{\epsilon} \perp\!\!\!\perp Y$ , then we have

$$p(X, Y) = p_{\tilde{\epsilon}}(X - g(Y))p_Y(Y),$$

and thus

$$\pi(X, Y) = \log p(X, Y) = \log(p_{\tilde{\epsilon}}(X - g(Y))) + \log p_Y(Y).$$

Denote by  $\tilde{v}(\cdot) = \log p_{\tilde{\epsilon}}(\cdot)$  and  $\tilde{\xi}(\cdot) = \log p_Y(\cdot)$ . Taking partial derivative of  $\pi(X, Y)$  with respect to  $X$ , we get

$$\frac{\partial \pi}{\partial X} = \tilde{v}'(X - g(Y)).$$

Furthermore, we have

$$\frac{\partial^2 \pi}{\partial X^2} = \tilde{v}''(X - g(Y)),$$

and

$$\frac{\partial \pi}{\partial X \partial Y} = -\tilde{v}''(X - g(Y))g'(Y).$$

We find that

$$\frac{\partial^2 \pi / \partial X \partial Y}{\partial \pi / \partial^2 X} = -g'(Y),$$

and thus

$$\frac{\partial}{\partial X} \left( \frac{\partial^2 \pi / \partial X \partial Y}{\partial^2 \pi / \partial X^2} \right) = 0.$$

Let us get back to the forward model where we have

$$p(X, Y) = p_X(X) \sum_{c=1}^C a_c p_{\epsilon}(Y - f_c(X)). \quad (1)$$

Taking log of both sides of (1), we get

$$\pi(X, Y) = \log p(X, Y) = \log \sum_{c=1}^C a_c p_\epsilon(Y - f_c(X)) + \log p_X(X).$$

For notation simplicity, we drop the argument of  $p_\epsilon(Y - f_c(X))$  and denote by  $\xi(\cdot) = \log(p_X(\cdot))$ , we get

$$\frac{\partial \pi}{\partial X} = \frac{-1}{\sum_c a_c p_\epsilon(Y - f_c(X))} \sum_c a_c p'_\epsilon(Y - f_c(X)) f'_c(X) + \xi'(X)$$

and

$$\begin{aligned} \frac{\partial^2 \pi}{\partial X \partial Y} &= \frac{1}{(\sum_c a_c p_\epsilon(Y - f_c(X)))^2} \sum_c a_c p'_\epsilon(Y - f_c(X)) \sum_c a_c p'_\epsilon(Y - f_c(X)) f'_c(X) \\ &\quad + \frac{-1}{\sum_c a_c p_\epsilon(Y - f_c(X))} \sum_c a_c p''_\epsilon(Y - f_c(X)) f'_c(X) \end{aligned}$$

$$\begin{aligned} \frac{\partial^2 \pi}{\partial X^2} &= \frac{-1}{(\sum_c a_c p_\epsilon(Y - f_c(X)))^2} \left( \sum_c a_c p'_\epsilon(Y - f_c(X)) f'_c(X) \right)^2 \\ &\quad + \frac{1}{\sum_c a_c p_\epsilon(Y - f_c(X))} \sum_c a_c p''_\epsilon(Y - f_c(X)) (f'_c(X))^2 \\ &\quad + \frac{-1}{\sum_c a_c p_\epsilon(Y - f_c(X))} \sum_c a_c p'_\epsilon(Y - f_c(X)) f''_c(X) + \xi''(X) \end{aligned}$$

Let

$$u = \frac{\partial^2 \pi}{\partial X \partial Y}$$

and denote by  $p_{\epsilon,c} = p_\epsilon(Y - f_c(X))$ ,  $p'_{\epsilon,c} = p'_\epsilon(Y - f_c(X))$ ,  $p''_{\epsilon,c} = p''_\epsilon(Y - f_c(X))$ ,  $p'''_{\epsilon,c} = p'''_\epsilon(Y - f_c(X))$  and  $f_c = f_c(X)$ ,  $f'_c = f'_c(X)$ ,  $f''_c = f''_c(X)$  and  $f'''_c = f'''_c(X)$ ,  $\xi = \xi(X)$ ,  $\xi' = \xi'(X)$ ,  $\xi'' = \xi''(X)$  and  $\xi''' = \xi'''(X)$ . We have

$$\begin{aligned} \frac{\partial u}{\partial X} &= \frac{2}{(\sum_c a_c p_{\epsilon,c})^3} \sum_c a_c p_{\epsilon,c} f'_c \sum_c a_c p'_{\epsilon,c} \sum_c a_c p'_{\epsilon,c} f'_c \\ &\quad + \frac{1}{(\sum_c a_c p_{\epsilon,c})^2} \left( - \sum_c a_c p''_{\epsilon,c} f'_c \sum_c a_c p'_{\epsilon,c} f'_c - \sum_c a_c p'_{\epsilon,c} \sum_c a_c p''_{\epsilon,c} (f'_c)^2 + \sum_c a_c p'_{\epsilon,c} \sum_c a_c p'_{\epsilon,c} f''_c \right) \\ &\quad + \frac{-1}{(\sum_c a_c p_{\epsilon,c})^2} \sum_c a_c p'_{\epsilon,c} f'_c \sum_c a_c p''_{\epsilon,c} f'_c + \frac{1}{\sum_c a_c p_{\epsilon,c}} \sum_c a_c p'''_{\epsilon,c} (f'_c)^2 + \frac{1}{\sum_c a_c p_{\epsilon,c}} \sum_c a_c p''_{\epsilon,c} f''_c \\ &= \frac{2}{(\sum_c a_c p_{\epsilon,c})^3} \sum_c a_c p_{\epsilon,c} f'_c \sum_c a_c p'_{\epsilon,c} \sum_c a_c p'_{\epsilon,c} f'_c \\ &\quad + \frac{1}{(\sum_c a_c p_{\epsilon,c})^2} \left( -2 \sum_c a_c p''_{\epsilon,c} f'_c \sum_c a_c p'_{\epsilon,c} f'_c - \sum_c a_c p'_{\epsilon,c} \sum_c a_c p''_{\epsilon,c} (f'_c)^2 + \sum_c a_c p'_{\epsilon,c} \sum_c a_c p'_{\epsilon,c} f''_c \right) \\ &\quad + \frac{1}{\sum_c a_c p_{\epsilon,c}} \sum_c a_c p'''_{\epsilon,c} (f'_c)^2 + \frac{1}{\sum_c a_c p_{\epsilon,c}} \sum_c a_c p''_{\epsilon,c} f''_c. \end{aligned}$$

Denote by

$$v = \frac{\partial^2 \pi}{\partial X^2},$$

then we have

$$\begin{aligned}\frac{\partial v}{\partial X} = & \frac{-2}{(\sum_c a_c p_{\epsilon,c})^3} \left( \sum_c a_c p'_{\epsilon,c} f'_c \right)^3 + \frac{-2}{(\sum_c a_c p_{\epsilon,c})^2} \left( \sum_c a_c p'_{\epsilon,c} f'_c \right) \sum_c a_c (p''_{\epsilon,c} (-f'_c) f_c + p'_{\epsilon,c} f''_c) \\ & + \frac{-1}{(\sum_c a_c p_{\epsilon,c})^2} \sum_c a_c p'_{\epsilon,c} f'_c \sum_c a_c p''_{\epsilon,c} (f'_c)^2 + \frac{-1}{\sum_c a_c p_{\epsilon,c}} \sum_c a_c p'''_{\epsilon,c} (f'_c)^3 + \frac{2}{\sum_c a_c p_{\epsilon,c}} \sum_c a_c p''_{\epsilon,c} f'_c f''_c \\ & + \frac{-1}{(\sum_c a_c p_{\epsilon,c})^2} \sum_c a_c p'_{\epsilon,c} f'_c \sum_c a_c p'_{\epsilon,c} f''_c + \frac{1}{\sum_c a_c p_{\epsilon,c}} \sum_c a_c p''_{\epsilon,c} f'_c f''_c + \frac{-1}{\sum_c a_c p_{\epsilon,c}} \sum_c a_c p'_{\epsilon,c} f'''_c + \xi'''\end{aligned}$$

Further denote by

$$U(X, Y) = \frac{\partial^2 \pi}{\partial X \partial Y} = \frac{1}{(\sum_c a_c p_{\epsilon,c})^2} \sum_c a_c p'_{\epsilon,c} \sum_c a_c p'_{\epsilon,c} f'_c + \frac{-1}{\sum_c a_c p_{\epsilon,c}} \sum_c a_c p''_{\epsilon,c} f'_c$$

and

$$\begin{aligned}V(X, Y) = & \frac{\partial^2 \pi}{\partial X^2} = \frac{-1}{(\sum_c a_c p_{\epsilon,c})^2} \left( \sum_c a_c p'_{\epsilon,c} f'_c \right)^2 + \frac{1}{\sum_c a_c p_{\epsilon,c}} \sum_c a_c p''_{\epsilon,c} (f'_c)^2 + \frac{-1}{\sum_c a_c p_{\epsilon,c}} \sum_c a_c p'_{\epsilon,c} f''_c \\ G(X, Y) = & \frac{2}{(\sum_c a_c p_{\epsilon,c})^3} \sum_c a_c p_{\epsilon,c} f'_c \sum_c a_c p'_{\epsilon,c} \sum_c a_c p'_{\epsilon,c} f'_c \\ & + \frac{1}{(\sum_c a_c p_{\epsilon,c})^2} \left( -2 \sum_c a_c p''_{\epsilon,c} f'_c \sum_c a_c p'_{\epsilon,c} f'_c - \sum_c a_c p'_{\epsilon,c} \sum_c a_c p''_{\epsilon,c} (f'_c)^2 + \sum_c a_c p'_{\epsilon,c} \sum_c a_c p'_{\epsilon,c} f''_c \right) \\ & + \frac{1}{\sum_c a_c p_{\epsilon,c}} \sum_c a_c p'''_{\epsilon,c} (f'_c)^2 + \frac{1}{\sum_c a_c p_{\epsilon,c}} \sum_c a_c p''_{\epsilon,c} f''_c\end{aligned}$$

and

$$\begin{aligned}H(X, Y) = & \frac{-2}{(\sum_c a_c p_{\epsilon,c})^3} \left( \sum_c a_c p'_{\epsilon,c} f'_c \right)^3 + \frac{-2}{(\sum_c a_c p_{\epsilon,c})^2} \left( \sum_c a_c p'_{\epsilon,c} f'_c \right) \sum_c a_c (p''_{\epsilon,c} (-f'_c) f_c + p'_{\epsilon,c} f''_c) \\ & + \frac{-1}{(\sum_c a_c p_{\epsilon,c})^2} \sum_c a_c p'_{\epsilon,c} f'_c \sum_c a_c p''_{\epsilon,c} (f'_c)^2 + \frac{-1}{\sum_c a_c p_{\epsilon,c}} \sum_c a_c p'''_{\epsilon,c} (f'_c)^3 + \frac{2}{\sum_c a_c p_{\epsilon,c}} \sum_c a_c p''_{\epsilon,c} f'_c f''_c \\ & + \frac{-1}{(\sum_c a_c p_{\epsilon,c})^2} \sum_c a_c p'_{\epsilon,c} f'_c \sum_c a_c p'_{\epsilon,c} f''_c + \frac{1}{\sum_c a_c p_{\epsilon,c}} \sum_c a_c p''_{\epsilon,c} f'_c f''_c + \frac{-1}{\sum_c a_c p_{\epsilon,c}} \sum_c a_c p'_{\epsilon,c} f'''_c\end{aligned}$$

Since

$$\frac{\partial^2 \pi / \partial X \partial Y}{\partial^2 \pi / \partial X^2} = 0$$

We have

$$u \frac{\partial v}{\partial X} - \frac{\partial u}{\partial X} v = 0$$

$$U(X, Y)(H(X, Y) + \xi''') - G(X, Y)(V(X, Y) + \xi'') = 0$$

Thus, we have

$$\xi''' - \frac{G(X, Y)}{H(X, Y)} \xi'' = \frac{G(X, Y)V(X, Y)}{U(X, Y)} - H(X, Y) \quad (2)$$

□

## B Derivation of (10)

The objective function  $\mathcal{J}$  reads

$$\mathcal{J} = -\mathcal{L}(\Theta | \mathbf{X}, \mathbf{Y}, \Omega) + \lambda \log \text{HSIC}_b(\mathbf{X}, \Theta). \quad (3)$$

Then the gradient of  $\mathcal{J}$  with respect to (w.r.t.) latent points  $\Theta$  can be computed as

$$\frac{\partial \mathcal{J}}{\partial [\Theta]_{ij}} = \text{tr} \left[ \left( \frac{\partial \mathcal{J}}{\partial \mathbf{K}_\Theta} \right)^T \frac{\partial \mathbf{K}_\Theta}{\partial [\Theta]_{ij}} \right], \quad (4)$$

where  $\mathbf{K}_\Theta$  is the kernel matrix of latent points in  $\Theta$ .  $\frac{\partial \mathcal{J}}{\partial \mathbf{K}_\Theta}$  can be obtained by

$$\frac{\partial \mathcal{J}}{\partial \mathbf{K}_\Theta} = \frac{\partial -\mathcal{L}}{\partial \mathbf{K}_\Theta} + \frac{\partial}{\partial \mathbf{K}_\Theta} \lambda \log \text{HSIC}_b(\mathbf{X}, \Theta). \quad (5)$$

The first term is computed as

$$\begin{aligned} -\frac{\partial \mathcal{L}}{\partial \mathbf{K}_\Theta} &= -\frac{\partial \mathcal{L}}{\partial [\mathbf{K}_\Theta]_{ij}} = -\text{tr} \left[ \left( \frac{\partial \mathcal{L}}{\partial \tilde{\mathbf{K}}} \right)^T \frac{\partial \tilde{\mathbf{K}}}{\partial [\mathbf{K}_\Theta]_{ij}} \right] \\ &= -\text{tr} \left[ \left( \tilde{\mathbf{K}}^{-1} \mathbf{Y} \mathbf{Y}^T \tilde{\mathbf{K}}^{-1} - D \tilde{\mathbf{K}}^{-1} \right)^T \left( \frac{\partial}{\partial [\mathbf{K}_\Theta]_{ij}} (\mathbf{K}_X \circ \mathbf{K}_\Theta) \right) \right] \\ &= -\text{tr} \left[ \left( \tilde{\mathbf{K}}^{-1} \mathbf{Y} \mathbf{Y}^T \tilde{\mathbf{K}}^{-1} - D \tilde{\mathbf{K}}^{-1} \right)^T \left( \frac{\partial \mathbf{K}_X}{\partial [\mathbf{K}_\Theta]_{ij}} \circ \mathbf{K}_\Theta + \mathbf{K}_X \circ \frac{\partial \mathbf{K}_\Theta}{\partial [\mathbf{K}_\Theta]_{ij}} \right) \right] \\ &= -\text{tr} \left[ \left( \tilde{\mathbf{K}}^{-1} \mathbf{Y} \mathbf{Y}^T \tilde{\mathbf{K}}^{-1} - D \tilde{\mathbf{K}}^{-1} \right)^T \left( \mathbf{K}_X \circ \frac{\partial \mathbf{K}_\Theta}{\partial [\mathbf{K}_\Theta]_{ij}} \right) \right] \\ &= -\text{tr} \left[ \left( \tilde{\mathbf{K}}^{-1} \mathbf{Y} \mathbf{Y}^T \tilde{\mathbf{K}}^{-1} - D \tilde{\mathbf{K}}^{-1} \right)^T (\mathbf{K}_X \circ \mathbf{J}^{ij}) \right], \end{aligned} \quad (6)$$

where  $\circ$  denotes the Hadamard product and  $\mathbf{J}^{ij}$  is the single-entry matrix, 1 at  $(i, j)$  and 0 elsewhere. The second term in Eq.(5) can be computed as

$$\frac{\partial}{\partial \mathbf{K}_\Theta} \lambda \log \text{HSIC}_b(\mathbf{X}, \Theta) = \frac{\partial}{\partial \mathbf{K}_\Theta} \lambda \log \text{tr} (\mathbf{K}_X \mathbf{H} \mathbf{K}_\Theta \mathbf{H}) = \lambda \frac{1}{\text{tr} (\mathbf{K}_X \mathbf{H} \mathbf{K}_\Theta \mathbf{H})} \mathbf{H} \mathbf{K}_X \mathbf{H}, \quad (7)$$

where  $\mathbf{H} = \mathbf{I} - \frac{1}{m} \vec{1} \vec{1}^T$  and  $\vec{1}$  is a  $m \times 1$  vector of ones. To this stage, we have found  $\frac{\partial \mathcal{J}}{\partial \mathbf{K}_\Theta}$  in Eq.(4).

## C Adjusted Rand Index

This section contains the definition of adjusted rand index (ARI) <sup>1</sup> for reference.<sup>2</sup>

The ARI is the corrected-for-chance version of the Rand index <sup>3</sup>. Though the Rand Index may only yield a value between 0 and +1, the ARI can yield negative values if the index is less than the expected index.

### The contingency table

Given a set  $S$  of  $n$  elements, and two groupings or partitions (e.g. clusterings) of these elements, namely  $X = \{X_1, X_2, \dots, X_r\}$  and  $Y = \{Y_1, Y_2, \dots, Y_s\}$ , the overlap between  $X$  and  $Y$  can be summarized in a contingency table  $[n_{ij}]$  where each entry  $n_{ij}$  denotes the number of objects in common between  $X_i$  and  $Y_j$ :  $n_{ij} = |X_i \cap Y_j|$ .

### Definition

The adjusted form of the Rand Index, the ARI is

$$\text{ARI} = \frac{\sum_{ij} \binom{n_{ij}}{2} - \left[ \sum_i \binom{a_i}{2} \sum_j \binom{b_j}{2} \right] / \binom{n}{2}}{\frac{1}{2} \left[ \sum_i \binom{a_i}{2} + \sum_j \binom{b_j}{2} \right] - \left[ \sum_i \binom{a_i}{2} \sum_j \binom{b_j}{2} \right] / \binom{n}{2}} \quad (8)$$

where  $n_{ij}$ ,  $a_i$ ,  $b_j$  are values from the contingency table.

<sup>1</sup>Hubert, L., & Arabie, P. (1985). Comparing partitions. Journal of classification, 2(1), 193-218.

<sup>2</sup>[https://en.wikipedia.org/wiki/Rand\\_index](https://en.wikipedia.org/wiki/Rand_index)

<sup>3</sup>Rand, W. M. (1971). Objective criteria for the evaluation of clustering methods. Journal of the American Statistical association, 66(336), 846-850.

Table 1: Contingency table

|          | $Y_1$    | $Y_2$    | $\dots$  | $Y_s$    | Sums     |
|----------|----------|----------|----------|----------|----------|
| $X_1$    | $n_{11}$ | $n_{12}$ | $\dots$  | $n_{1s}$ | $a_1$    |
| $X_2$    | $n_{21}$ | $n_{22}$ | $\dots$  | $n_{2s}$ | $a_2$    |
| $\vdots$ | $\vdots$ | $\vdots$ | $\ddots$ | $\vdots$ | $\vdots$ |
| $X_r$    | $n_{r1}$ | $n_{r2}$ | $\dots$  | $n_{rs}$ | $a_r$    |
| Sums     | $b_1$    | $b_2$    | $\dots$  | $b_s$    |          |

## D Clustering Results Visualization

In this section, clustering results with ARI of ANM-MM close to  $\text{avgARI}^4$  shown in Table 1 are visualized. Results of comparing approaches on the same data are also given.

### D.1 Experiments different generating mechanisms and sample size

The ground truth and clustering results of all approaches in one of the 100 independent experiments are visualized in Fig. 1.

### D.2 Experiments on different number of generating mechanisms

The ground truth and clustering results of all approaches in one of the 100 independent experiments are visualized in Fig. 2.

### D.3 Experiments on different noise standard deviation

The ground truth and clustering results of all approaches in one of the 100 independent experiments are visualized in Fig. 3.

### D.4 Experiments on different mixing proportions

The ground truth and clustering results of all approaches in one of the 100 independent experiments are visualized in Fig. 4.

---

<sup>4</sup>in the sense that  $|\text{ARI} - \text{avgARI}| < 0.05$

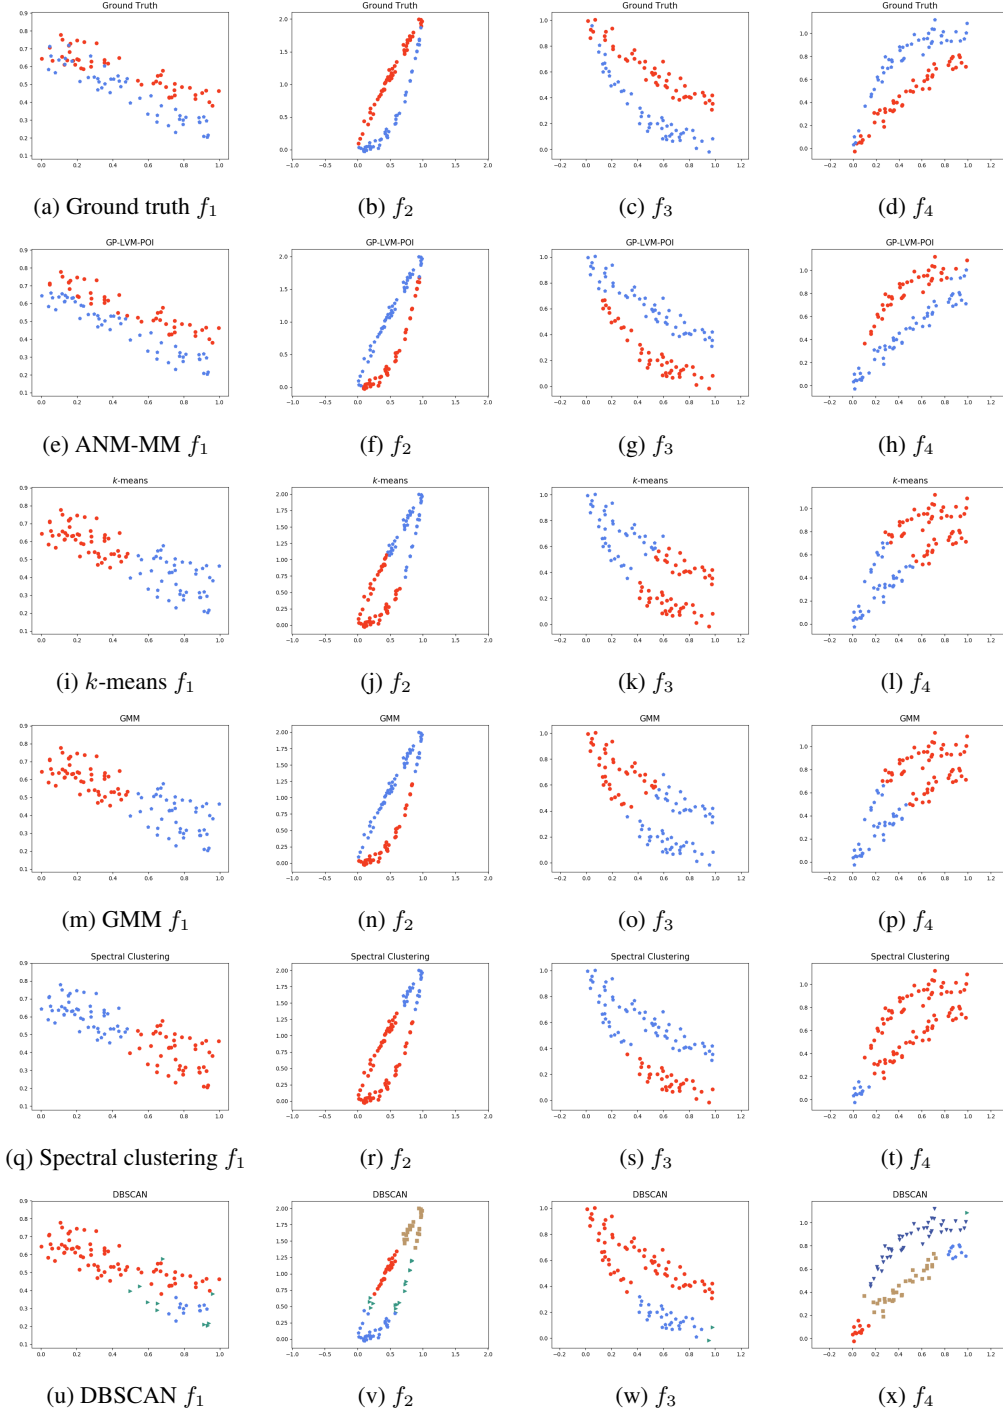

Figure 1: Clustering results different type of mechanisms. The first row shows the ground truth and remaining rows correspond to different clustering approaches. Each column corresponds to a generating mechanism.

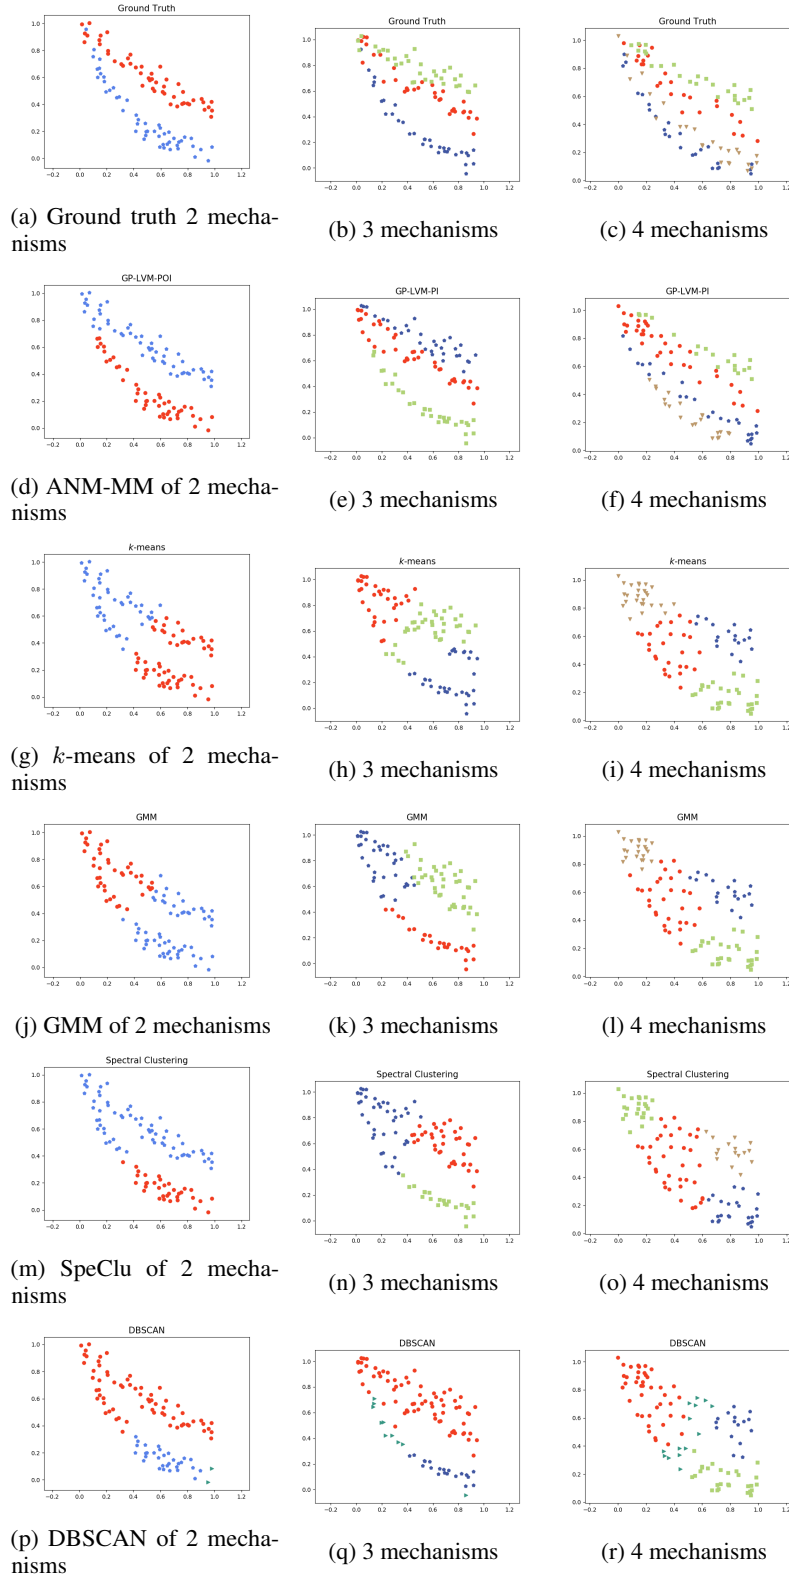

Figure 2: Clustering results on different number of mechanisms. The first row shows the ground truth and remaining rows correspond to different clustering approaches. Each column corresponds to a number of generating mechanisms.

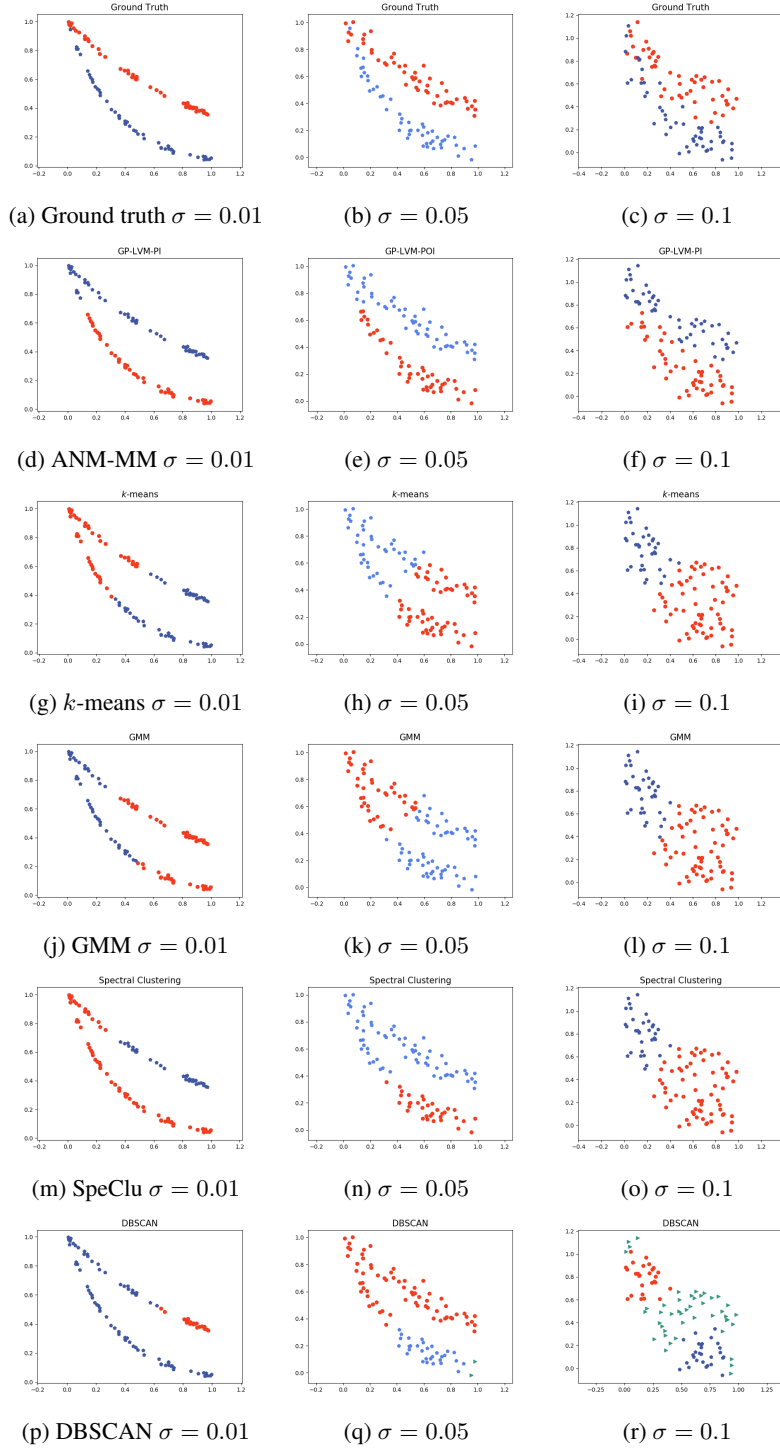

Figure 3: Clustering results on different noise standard deviations. The first row shows the ground truth and remaining rows correspond to different clustering approaches. Each column corresponds to a value of  $\sigma$ .



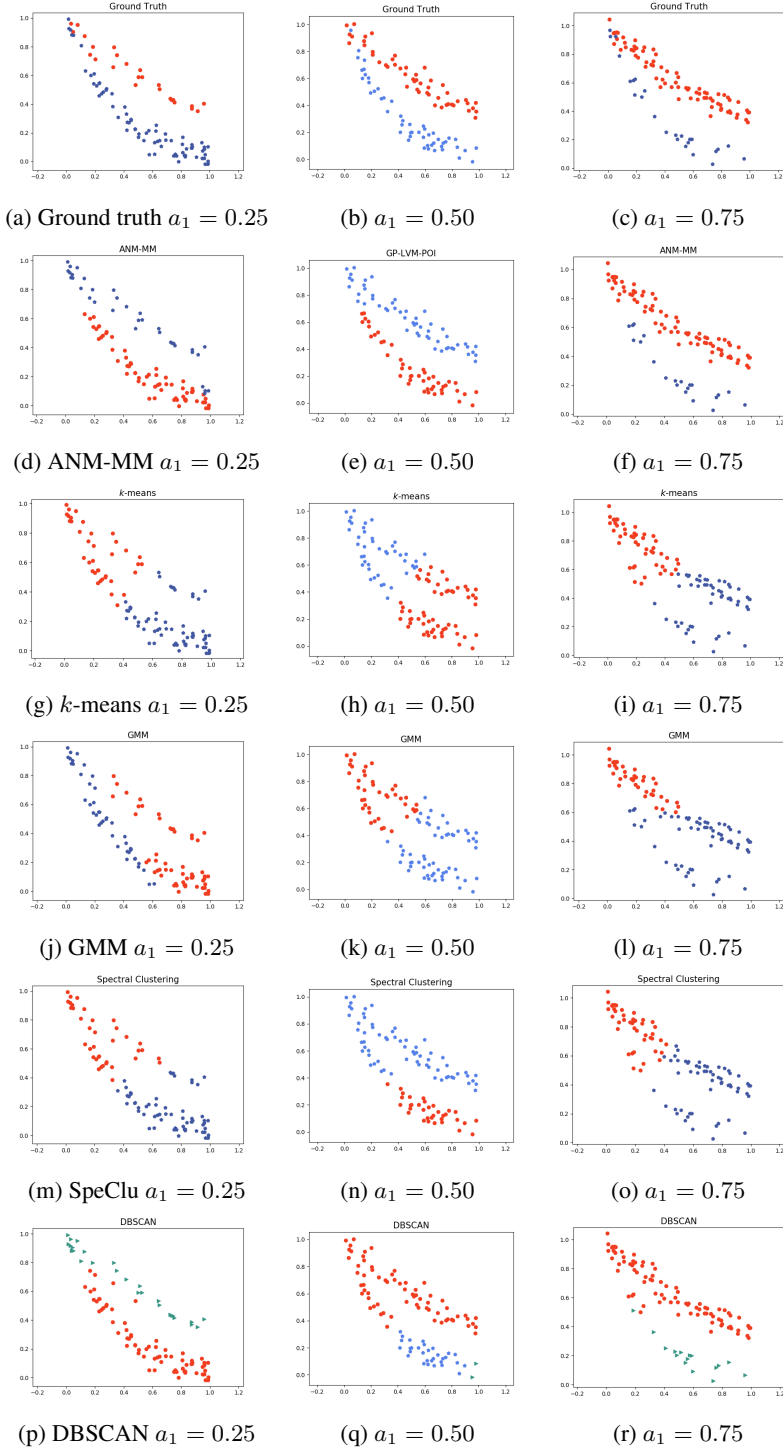

Figure 4: Clustering results different mixing proportions. The first row shows the ground truth and remaining rows correspond to different clustering approaches. Each column corresponds to a value of  $a_1$ .
